# Supplementary material for: Coincidence detection and bi-directional transmembrane signaling control a bacterial second messenger receptor
Source: eLife. 2016 Dec 21;5:e21848. doi: 10.7554/eLife.21848 (PMC5231407; doi:10.7554/eLife.21848)
Supplement: Figure 4—source data 1. — All analyses were performed using the indicated programs included in the ATSAS 2.7.1 software package (Petoukhov et al., 2012). Rg, radius of gyration; Dmax, maximal particle dimension; Porod volume, volume of scattering particle; NSD, normalized spatial discrepancy; Rflex and Rsigma, as previously defined (Tria et al., 2015). DOI: http://dx.doi.org/10.7554/eLife.21848.010 [file elife-21848-fig4-data1.xlsx]

## Sheet: Sheet1
Figure 4 - Source Data 1
	Guinier		GNOM P(r)				Dammin		SASREF	EOM (single EAL domain)					EOM (dual EAL domain)
	qRg	R(g)	Quality estimate	Rg (A)	Dmax (A)	Porod volume (A^3)	c2	NSD	c2	c2	Rflex (pool), %	Rsigma	Weighted Rg (A)	Weighted Dmax (A)	c2	Rflex (pool), %	Rsigma	Weighted Rg (A)	Weighted Dmax (A)
apo	0.52-1.565	52.1 +/- 0.09	92.2	53.6	182	388554	1	0.71	1.4	4.3	57.1 (87.4)	5.1	54.4	196.1	1.7	79.7 (82.8)	6.2	55.2	193.6
trapped-inactive	0.57-1.56	50.1 +/- 0.08	94.4	51.56	168	352628	1.1	0.63	1.6	1.5	54.8 (87.4)	5.5	53.8	194.3	1.5	66.8 (82.8)	4.2	57.2	182.2
c-di-GMP-bound	0.61-1.48	50.0 +/- 0.18	89.3	51.8	180	352303	0.9	0.62	1.2	3.4	63.6 (87.4)	9.9	57.7	209.8	2.9	81 (82.8)	5.9	55.9	192
c-di-GMP/LapG-bound	0.67-1.71	72.0 +/- 0.16	93.4	73.58	247	936601	1	0.87	1.5	N/A	N/A	N/A	N/A	N/A	N/A	N/A	N/A
